# Supplementary material for: Thermal and bisphenol-A adsorption properties of a zinc ferrite/β-cyclodextrin polymer nanocomposite
Source: Royal Society of Chemistry journal article supplement (doi:10.1039/d3ra03331g), 2023-01-01
Supplement: d3ra03331g1.pdf [file d3ra03331g1.pdf]

## Supporting Information

### **Thermal and Bisphenol-A Adsorption Properties of Zinc Ferrite/ $\beta$ -Cyclodextrin Polymer Nanocomposite**

Ruksana Sirach<sup>1</sup>, Pragnesh N Dave<sup>\*,1</sup>

<sup>1</sup>Department of Chemistry, Sardar Patel University, Vallabh Vidyanagar, 388 120, Gujarat, India

\*Corresponding author: *pragnesh7@yahoo.com*

#### Table

**Table S1.** Details of chemicals used in the present study (purity ~98-99%)

**Table S2.** Temperature at different conversion percentage values for the decomposition of  $\beta$ -CD-E-T and  $\beta$ -CD-E-T/ZnFe<sub>2</sub>O<sub>4</sub> ( $\beta=5, 10, 15, \text{ and } 20 \text{ }^\circ\text{C min}^{-1}$ )

#### Figures

**Fig. S1** Calibration curve of BPA

**Fig. S2** BJH analysis for the pore size distribution and N<sub>2</sub> adsorption-desorption curve (Inset) of  $\beta$ -CD-E-T/ZnFe<sub>2</sub>O<sub>4</sub>.

**Fig. S3** Conversion plots ( $\alpha \rightarrow T$ ) of (a)  $\beta$ -CD-E-T and  $\beta$ -CD-E-T/ZnFe<sub>2</sub>O<sub>4</sub> at 5, 10, 15, and 20  $^\circ\text{C min}^{-1}$

**Fig. S4** Kinetics plots of  $\beta$ -CD-E-T (a) FWO, (b) KAS, and  $\beta$ -CD-E-T/ZnFe<sub>2</sub>O<sub>4</sub> (c) FWO, and (d) KAS

**Fig. S5** Average activation energy of  $\beta$ -CD-E-T and  $\beta$ -CD-E-T/ZnFe<sub>2</sub>O<sub>4</sub> obtained using FWO, KAS, it-FWO, and it-KAS method.

**Fig. S6** Effect of (a)  $\beta$ -CD-E-T/ZnFe<sub>2</sub>O<sub>4</sub> dose and (b) BPA amount in aqueous solution on the adsorption capacity and R% of  $\beta$ -CD-E-T/ZnFe<sub>2</sub>O<sub>4</sub>

**Fig. S7** Plot of  $\ln K_e$  against  $1/T$  for the removal of BPA using  $\beta$ -CD-E-T/ZnFe<sub>2</sub>O<sub>4</sub> adsorbent

#### Equations

Linear forms of Langmuir equation:

$$\frac{C_e}{q_e} = \frac{1}{q_m} C_e + \frac{1}{K_L q_m} \quad (\text{S1})$$

$$\frac{q_e}{C_e} = K_L q_m - K_L q_e \quad (\text{S2})$$

$$\frac{1}{q_e} = \frac{1}{q_m} + \frac{1}{K_L q_m} \times \frac{1}{C_e} \quad (\text{S3})$$

$$q_e = q_m - \frac{1}{K_L} \times \frac{q_e}{C_e} \quad (\text{S4})$$

The plot of  $C_e/q_e$  vs.  $C_e$  (Eq. S1),  $q_e/C_e$  vs.  $q_e$  (Eq. S2),  $1/q_e$  vs.  $1/C_e$  (Eq. 3), or  $q_e$  vs.  $q_e/C_e$  can be used to obtain Langmuir isotherms parameters using slope and the interception.

## **Tables**

**Table S1.** Details of chemicals used in the present study (purity ~98-99%)

| <b>Chemical</b>                   | <b>Molar mass (g mol<sup>-1</sup>)</b> | <b>CAS</b> | <b>Supplier</b> |
|-----------------------------------|----------------------------------------|------------|-----------------|
| Zinc (II) nitrate hexahydrate     | 297.5                                  | 10196-18-6 | SRL             |
| Iron (III) nitrate<br>nonahydrate | 404.0                                  | 7782-61-8  | SRL             |
| sodium hydroxide                  | 40.0                                   | 1310-73-2  | Samir Tech      |
| Sodium acetate                    | 82.0                                   | 127-09-3   | SRL             |
| $\beta$ -Cyclodextrin             | 1135.0                                 | 7585-39-9  | HiMedia         |
| Epichlorohydrin                   | 92.5                                   | 106-89-8   | Merck           |
| Tetrafluoroterephthalonitrile     | 200.1                                  | 1835-49-0  | Merck           |
| Ethylene diamine                  | 60.1                                   | 107-15-3   | SRL             |
| Tetrahydrofuran                   | 72.1                                   | 109-99-9   | Samir Tech      |
| Ethylene glycol                   | 62.1                                   | 107-21-1   | SRL             |
| Bisphenol A                       | 228.3                                  | 80-05-7    | SRL             |

**Table S2.** Temperature at different conversion percentage values for the decomposition of  $\beta$ -CD-E-T and  $\beta$ -CD-E-T/ZnFe<sub>2</sub>O<sub>4</sub> ( $\beta=5, 10, 15,$  and  $20 \text{ }^\circ\text{C min}^{-1}$ )

| Extent of<br>conversion | $\beta$ -CD-E-T                               |                 |                 |                 | $\beta$ -CD-E-T/ZnFe <sub>2</sub> O <sub>4</sub> |                 |                 |                 |
|-------------------------|-----------------------------------------------|-----------------|-----------------|-----------------|--------------------------------------------------|-----------------|-----------------|-----------------|
|                         | Temperature (K) at different heating<br>rates |                 |                 |                 | Temperature (K) at different heating<br>rates    |                 |                 |                 |
| $\alpha$ (%)            | $T_\alpha$ (5)                                | $T_\alpha$ (10) | $T_\alpha$ (15) | $T_\alpha$ (20) | $T_\alpha$ (5)                                   | $T_\alpha$ (10) | $T_\alpha$ (15) | $T_\alpha$ (20) |
| 10                      | 567                                           | 580             | 587             | 594             | 561                                              | 572             | 577             | 580             |
| 12.5                    | 573                                           | 585             | 592             | 599             | 566                                              | 577             | 582             | 585             |
| 15                      | 577                                           | 589             | 596             | 602             | 570                                              | 581             | 586             | 590             |

---

|      |     |     |     |     |     |     |     |     |
|------|-----|-----|-----|-----|-----|-----|-----|-----|
| 17.5 | 581 | 592 | 599 | 606 | 573 | 585 | 589 | 593 |
| 20   | 584 | 595 | 602 | 608 | 576 | 588 | 592 | 597 |
| 22.5 | 586 | 598 | 605 | 611 | 579 | 591 | 595 | 599 |
| 25   | 589 | 600 | 607 | 613 | 581 | 593 | 598 | 602 |
| 27.5 | 591 | 602 | 609 | 615 | 584 | 596 | 600 | 604 |
| 30   | 593 | 604 | 611 | 617 | 586 | 598 | 602 | 607 |
| 32.5 | 594 | 606 | 612 | 618 | 588 | 600 | 604 | 609 |
| 35   | 596 | 608 | 614 | 620 | 590 | 602 | 606 | 611 |
| 37.5 | 597 | 609 | 616 | 622 | 592 | 603 | 608 | 612 |
| 40   | 599 | 611 | 617 | 623 | 593 | 605 | 610 | 614 |
| 42.5 | 600 | 612 | 619 | 625 | 595 | 607 | 612 | 616 |
| 45   | 602 | 614 | 620 | 626 | 597 | 609 | 613 | 618 |
| 47.5 | 603 | 615 | 622 | 627 | 598 | 610 | 615 | 619 |
| 50   | 604 | 617 | 623 | 629 | 600 | 612 | 616 | 621 |
| 52.5 | 605 | 618 | 624 | 630 | 602 | 613 | 618 | 622 |
| 55   | 607 | 620 | 626 | 631 | 603 | 615 | 620 | 624 |
| 57.5 | 608 | 621 | 627 | 632 | 605 | 617 | 621 | 626 |
| 60   | 609 | 622 | 628 | 634 | 607 | 618 | 623 | 627 |
| 62.5 | 611 | 624 | 630 | 635 | 609 | 620 | 625 | 629 |
| 65   | 612 | 625 | 631 | 636 | 610 | 622 | 626 | 630 |
| 67.5 | 614 | 627 | 633 | 638 | 612 | 623 | 628 | 632 |
| 70   | 616 | 629 | 634 | 639 | 614 | 625 | 630 | 634 |
| 72.5 | 618 | 631 | 636 | 641 | 616 | 627 | 632 | 636 |
| 75   | 620 | 632 | 638 | 642 | 619 | 629 | 634 | 638 |
| 77.5 | 622 | 635 | 639 | 644 | 622 | 632 | 636 | 640 |
| 80   | 625 | 637 | 642 | 646 | 625 | 635 | 639 | 642 |
| 82.5 | 628 | 640 | 644 | 648 | 629 | 638 | 642 | 645 |
| 85   | 631 | 643 | 647 | 651 | 633 | 642 | 645 | 648 |
| 87.5 | 636 | 647 | 651 | 654 | 639 | 647 | 649 | 652 |
| 90   | 641 | 653 | 656 | 658 | 647 | 653 | 655 | 657 |

---

## Figures

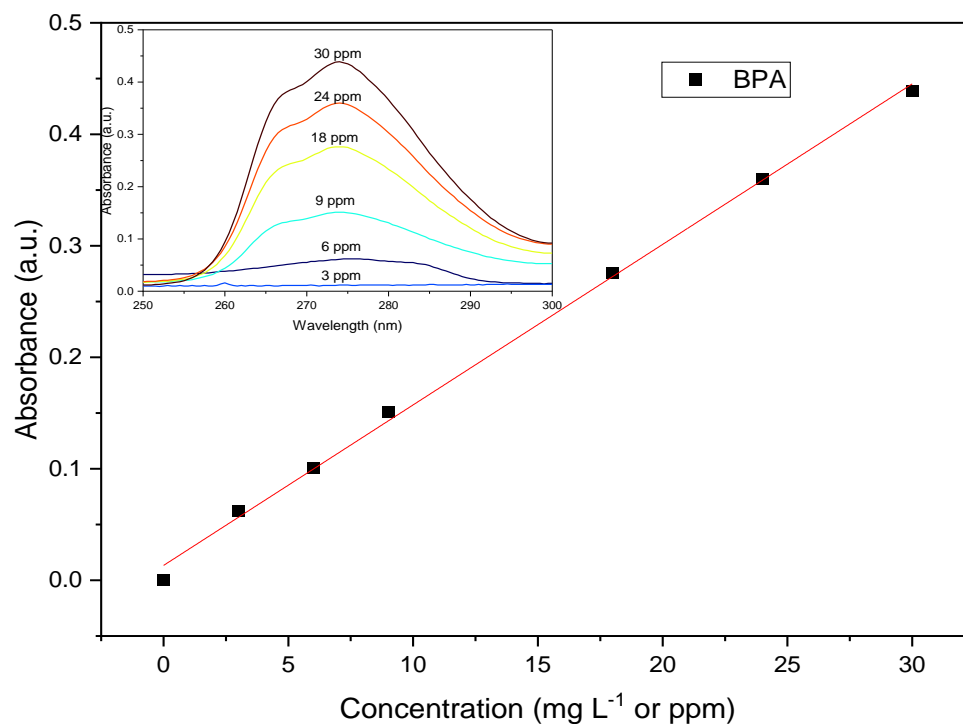

Fig. S1 Calibration curve of BPA

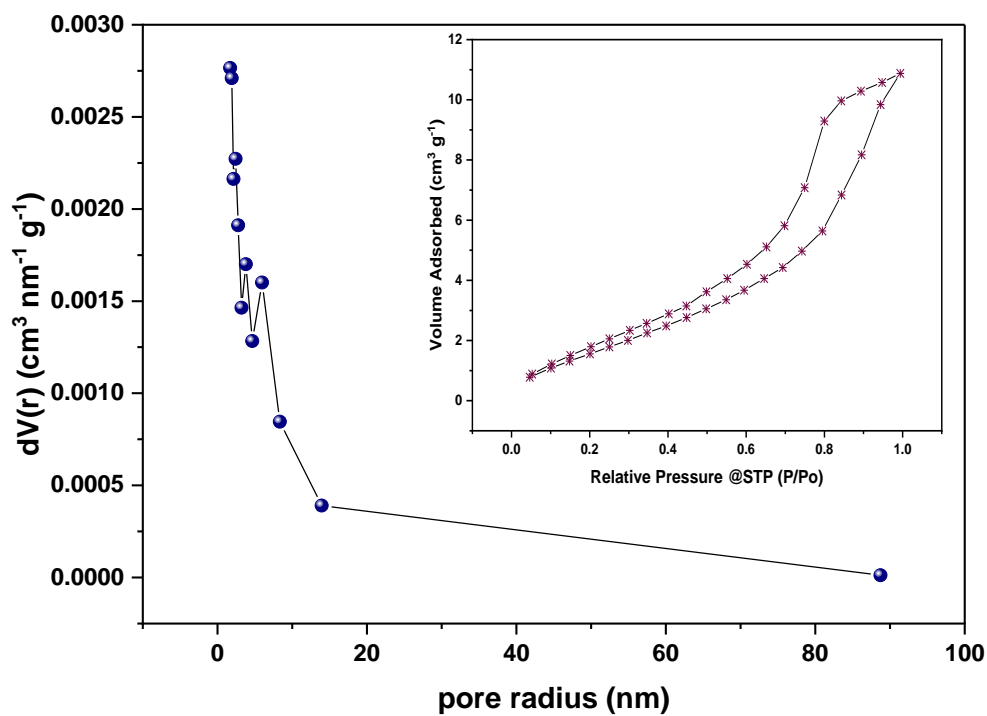

Fig. S2 BJH analysis for the pore size distribution and N<sub>2</sub> adsorption-desorption curve (Inset) of  $\beta$ -CD-E-T/ZnFe<sub>2</sub>O<sub>4</sub>

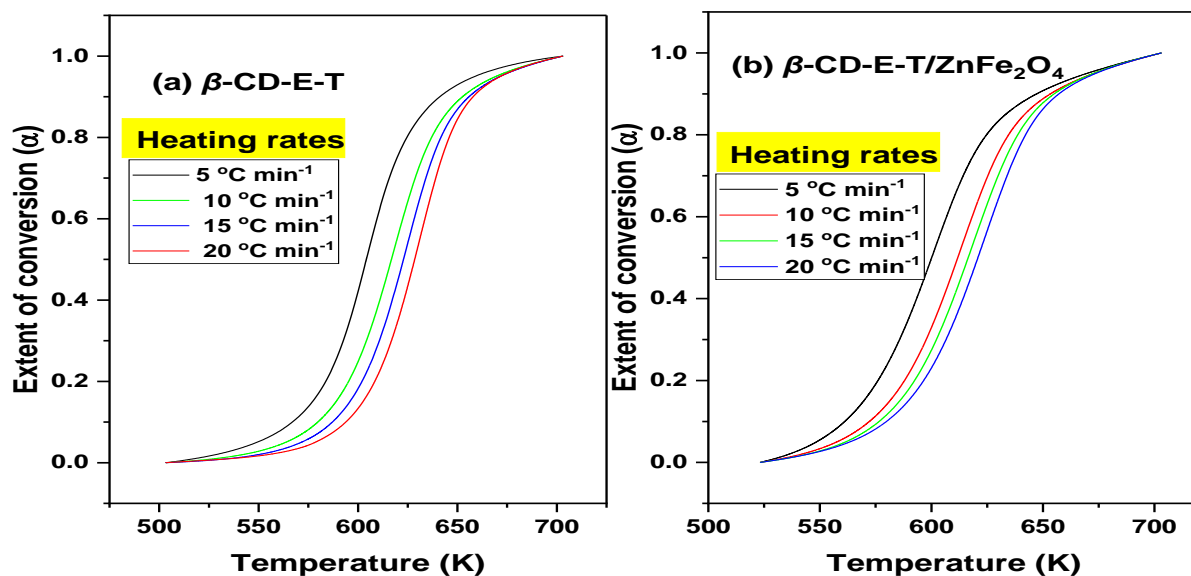

**Fig. S3** Conversion plots ( $\alpha \rightarrow T$ ) of (a)  $\beta$ -CD-E-T and  $\beta$ -CD-E-T/ $\text{ZnFe}_2\text{O}_4$  at 5, 10, 15, and 20  $^\circ\text{C min}^{-1}$

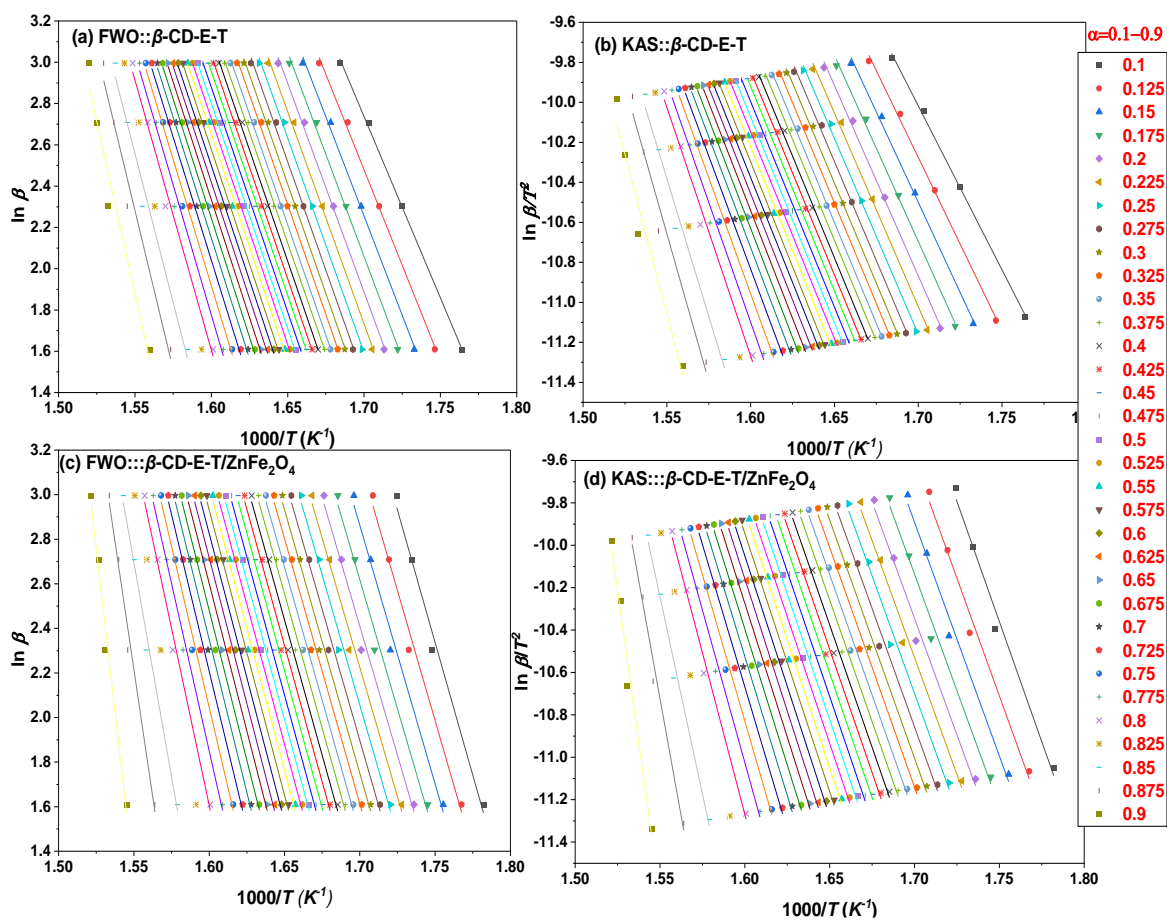

**Fig. S4** Kinetics plots of  $\beta$ -CD-E-T (a) FWO, (b) KAS, and  $\beta$ -CD-E-T/ $\text{ZnFe}_2\text{O}_4$  (c) FWO, and (d) KAS

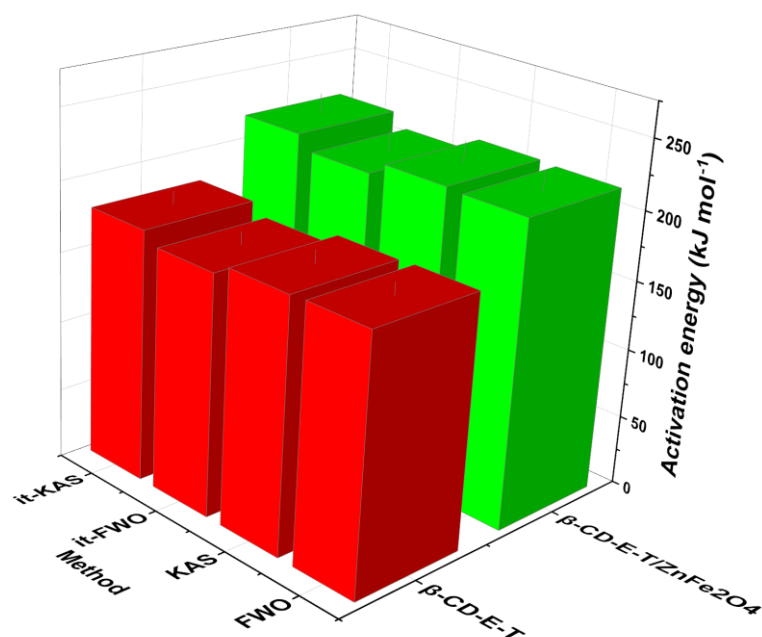

**Fig. S5** Average activation energy of  $\beta$ -CD-E-T and  $\beta$ -CD-E-T/ZnFe<sub>2</sub>O<sub>4</sub> obtained using FWO, KAS, it-FWO, and it-KAS method.

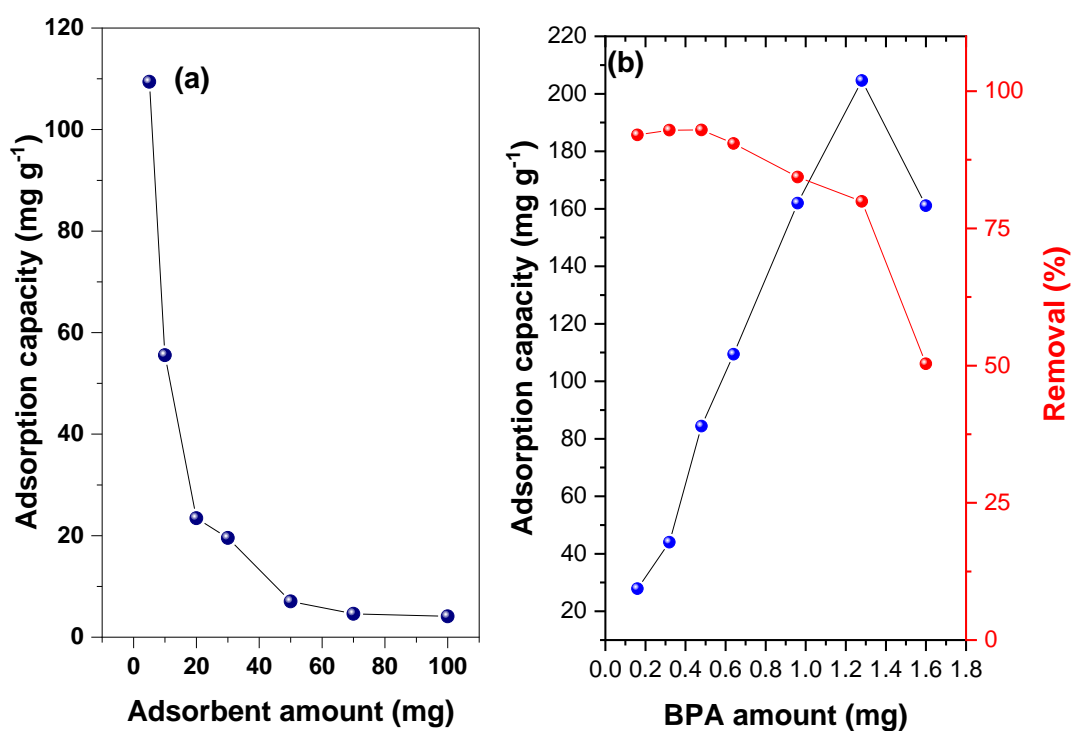

**Fig. S6** Effect of (a)  $\beta$ -CD-E-T/ZnFe<sub>2</sub>O<sub>4</sub> dose and (b) BPA amount in aqueous solution on the adsorption capacity and R% of  $\beta$ -CD-E-T/ZnFe<sub>2</sub>O<sub>4</sub>

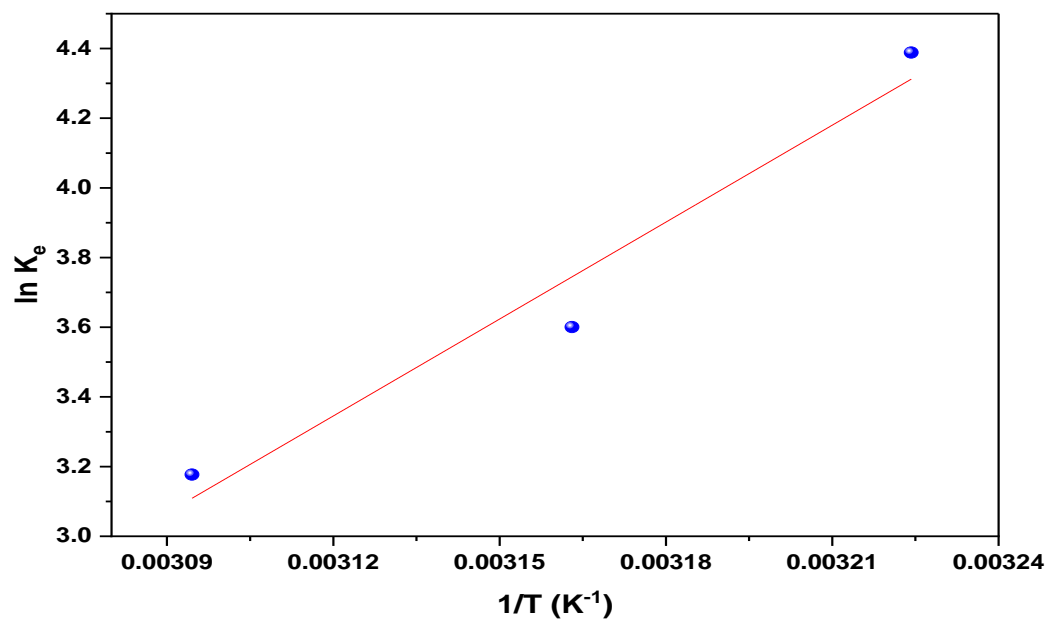

**Fig. S7** Plot of  $\ln K_e$  against  $1/T$  for the removal of BPA using  $\beta$ -CD-E-T/ $ZnFe_2O_4$  adsorbent
